# Supplementary material for: Quantification of Statins in Pharmaceutical Products Using Screen-Printed Sensors Based of Multi-Walled Carbon Nanotubes and Gold Nanoparticles
Source: MDPI journal article supplement (doi:10.3390/inventions8050111), 2023-08-30
Supplement: s1 [file s1]

# Quantification of Statins in Pharmaceutical Products Using Screen-Printed Sensors Based of Multi-Walled Carbon Nanotubes and Gold Nanoparticles

Ramona Oana Roșca, Alexandra Virginia Bounegru and Constantin Apetrei \*

Department of Chemistry, Physics and Environment, Faculty of Sciences and Environment, “Dunărea de Jos” University of Galați, 47 Domnească Street, 800008 Galați, Romania; oana.gunache@ugal.ro (R.O.R.); alexandra.meresescu@ugal.ro (A.V.B.)

\* Correspondence: apetreic@ugal.ro; Tel.: +40-727-580-914

Supplementary information

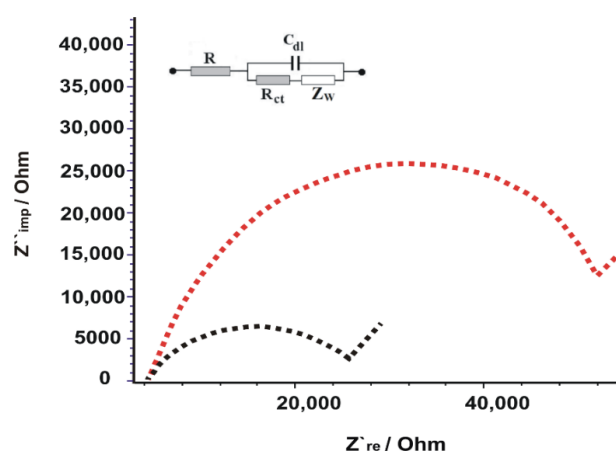

**Figure S1.** Nyquist plots of EIS for SPE/C (red line) and SPE/AuNP-CNT (black line) in  $K_3[Fe(CN)_6]/K_4[Fe(CN)_6]$   $5 \cdot 10^{-4}$  M /  $5 \cdot 10^{-4}$  M - KCl 0.1 M for a frequency range from 1 Hz to 100 kHz, amplitude 10 mV. Inset: Equivalent circuit used to fit the impedance spectra.

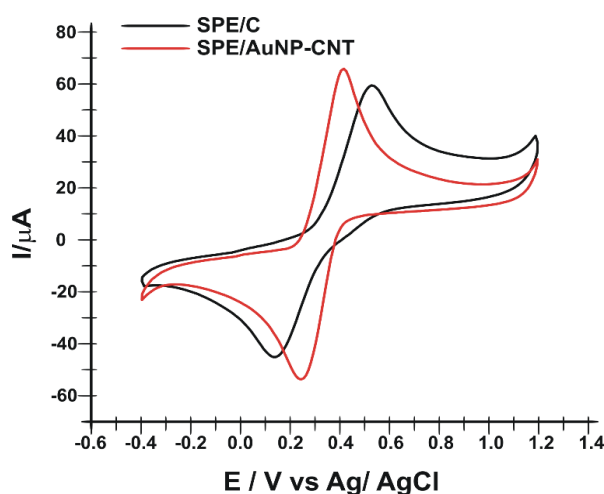

**Figure S2.** Cyclic voltammograms recorded at SPE/C (black line) and SPE/AuNP-CNT (red line) in  $10^{-3}$  M catechol – 0.1 M KCl solution. Scan rate 0.1 V/s.

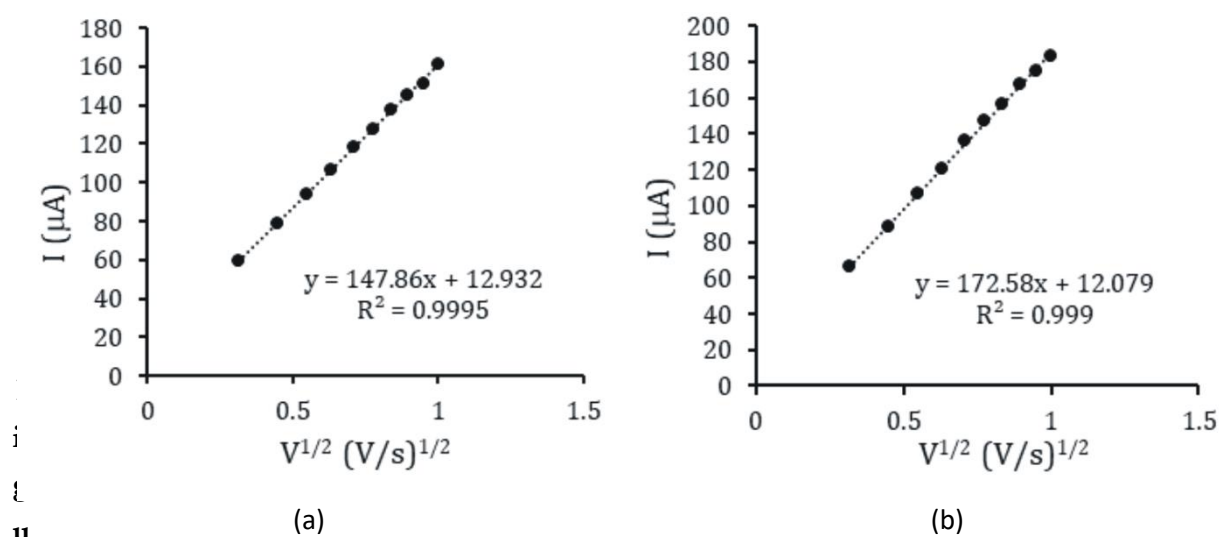

**Figure S3.** Dependence  $I$  vs. the square root of the scan rate in the case SPE/C (a) and SPE/AuNP-CNT (b).

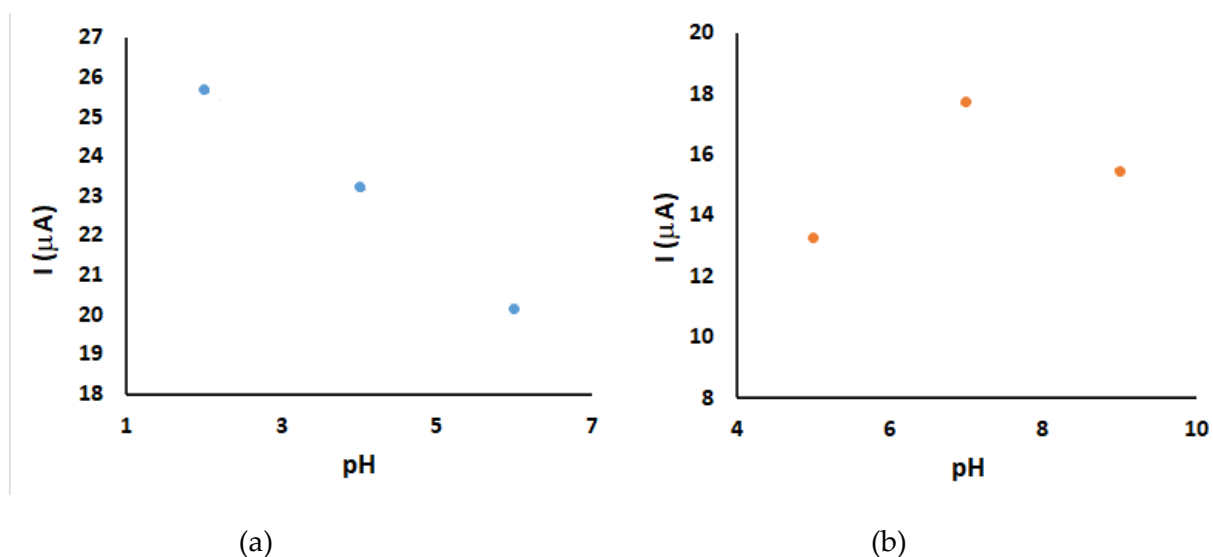

**Figure S4.** Plot of  $I_{pa}$  vs pH of 30  $\mu\text{M}$  RV (a) and 30  $\mu\text{M}$  SV (b) solution using cyclic voltammetry.

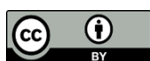

**Table S1.** Electrochemical parameters obtained from cyclic voltammograms of sensors immersed in  $10^{-3}$  M catechol – 0.1 M KCl aqueous solution.

| Electrode    | $E_{pa}$ (V) | $E_{pc}$ (V) | $E_{1/2}$ (V) | $\Delta E$ (V) | $I_a$ ( $\mu A$ ) | $I_c$ ( $\mu A$ ) | $I_c/I_a$ |
|--------------|--------------|--------------|---------------|----------------|-------------------|-------------------|-----------|
| SPE/C        | 0.530        | 0.134        | 0.332         | 0.396          | 59.49             | -45.19            | 0.76      |
| SPE/AuNP-CNT | 0.417        | 0.241        | 0.329         | 0.176          | 65.30             | -53.74            | 0.89      |

where:  $I_a$  – anodic peak current;  $I_c$  – cathodic peak current;  $E_{pa}$ – anodic peak potential;  $E_{pc}$ – potential of the cathodic peak;  $E_{1/2}$  – the half-wave potential,  $\Delta E = E_{pa} - E_{pc}$ .

**Table S2.** Geometrical area, active surface area, and roughness factor for SPE/C and SPE/AuNP-CNT.

| Electrode    | Geometrical area<br>( $cm^2$ ) | m (slope)  | Active area<br>( $cm^2$ ) | Roughness factor |
|--------------|--------------------------------|------------|---------------------------|------------------|
| SPE/C        | 0.1256                         | 0.00014786 | 0.6675                    | 5.314            |
| SPE/AuNP-CNT |                                | 0.00017258 | 0.7791                    | 6.203            |
